# Supplementary material
Source: PubMed Central journal article supplement (PMC9011362)
Supplement: NIHMS763681-supplement-Supplementary_Material.pdf [file NIHMS763681-supplement-Supplementary_Material.pdf]

## Supplemental Information

**SUPPLEMENTAL TABLE 4** Adjusted Associations Between Each 1000 mg/d Increase in Sodium Intake and SDD of BP Among US Children and Adolescents Aged 12 to 18 Years, Based on 2 Models, Overall and by Weight Status, NHANES 2003–2008

| Characteristics  | Number of Participants | SDS of SBP                                     |                | SDS of DBP                                     |                |
|------------------|------------------------|------------------------------------------------|----------------|------------------------------------------------|----------------|
|                  |                        | $\beta$ -Coefficient (95% CI)<br>per 1000 mg/d | <i>P</i> Value | $\beta$ -Coefficient (95% CI)<br>per 1000 mg/d | <i>P</i> Value |
| All              | 4352                   |                                                |                |                                                |                |
| Model 1          |                        | 0.158 (0.047 to 0.270)                         | .006           | −0.055 (−0.188 to 0.077)                       | .404           |
| Model 2          |                        | 0.109 (0.06 to 0.212)                          | .039           | −0.099 (−0.328 to 0.130)                       | .389           |
| Weight status    |                        |                                                |                |                                                |                |
| Normal weight    | 2613                   |                                                |                |                                                |                |
| Model 1          |                        | 0.073 (−0.049 to 0.195)                        | .233           | −0.112 (−0.277 to 0.053)                       | .177           |
| Model 2          |                        | 0.052 (−0.084 to 0.189)                        | .445           | −0.112 (−0.275 to 0.051)                       | .172           |
| Overweight/obese | 1739                   |                                                |                |                                                |                |
| Model 1          |                        | 0.269 (0.058 to 0.481)                         | .014           | 0.039 (−0.203 to 0.281)                        | .748           |
| Model 2          |                        | 0.219 (0.023 to 0.415)                         | .029           | 0.020 (−0.231 to 0.272)                        | .871           |

Model 1 adjusted for age, gender, race/ethnicity, and total energy intake. Model 2 adjusted for age, gender, race/ethnicity, weight status (normal, overweight, and obese except for the weight-stratified analyses where we include BMI as a continuous variable), physical activity, table-salt use, and estimated usual intakes of potassium. Physical activity was consistently measured among children aged  $\geq 12$  of age in NHANES 2003–2006, but the questions were modified in NHANES 2007–2008; thus, we adjusted for the modified questions to calculate the physical activity categories across the surveys. *P* values for usual intake of sodium by BMI interactions were .550 and .477 for SBP and DBP, respectively, based on Satterthwaite adjusted *F* test; all tests 2-tailed.

**SUPPLEMENTAL TABLE 5** Adjusted ORs for Pre-HBP and HBP Among US Children and Adolescents Aged 12 to 18 Years, by Quartile of Usual Daily Sodium Intake, NHANES, 2003–2008

| Characteristics                  | Midvalue of Quartiles of Estimated Usual Intake of Sodium in Population |                     |                     |                      | <i>P</i> Value for Trend <sup>a</sup> | Total/OR per 1000 mg/d <sup>b</sup> | RERI (95% CI)        |
|----------------------------------|-------------------------------------------------------------------------|---------------------|---------------------|----------------------|---------------------------------------|-------------------------------------|----------------------|
|                                  | Q1                                                                      | Q2                  | Q3                  | Q4                   |                                       |                                     |                      |
| Total                            |                                                                         |                     |                     |                      |                                       |                                     |                      |
| Usual intakes (range: 1334–8177) | 2278                                                                    | 3057                | 3775                | 4879                 |                                       |                                     |                      |
| Model 1                          | 1.0                                                                     | 1.31 (0.98 to 1.76) | 1.68 (0.96 to 2.99) | 2.47 (0.93 to 6.57)  | .0686                                 | 1.42 (0.97 to 2.06)                 | 0.36 (−0.05 to 1.48) |
| Model 2                          | 1.0                                                                     | 1.19 (0.90 to 1.57) | 1.40 (0.82 to 2.39) | 1.80 (0.71 to 4.53)  | .207                                  | 1.25 (0.88 to 1.79)                 | 0.38 (−0.04 to 1.41) |
| Weight status                    |                                                                         |                     |                     |                      |                                       |                                     |                      |
| Normal weight                    |                                                                         |                     |                     |                      |                                       |                                     |                      |
| Usual intakes (range: 1354–8177) | 2276                                                                    | 3055                | 3768                | 4862                 |                                       |                                     |                      |
| Model 1                          | 1.0                                                                     | 1.01 (0.75 to 1.37) | 1.03 (0.57 to 1.83) | 1.05 (0.38 to 2.86)  | .929                                  | 1.02 (0.69 to 1.50)                 | —                    |
| Model 2                          | 1.0                                                                     | 0.98 (0.69 to 1.40) | 0.97 (0.49 to 1.91) | 0.94 (0.29 to 3.07)  | .920                                  | 0.98 (0.62 to 1.54)                 | —                    |
| Overweight/obese                 |                                                                         |                     |                     |                      |                                       |                                     |                      |
| Usual intakes (range: 1334–6862) | 2281                                                                    | 3073                | 3800                | 4905                 |                                       |                                     |                      |
| Model 1                          | 1.0                                                                     | 1.75 (1.15 to 2.65) | 2.92 (1.31 to 6.48) | 6.36 (1.60 to 25.21) | .010                                  | 2.02 (1.20 to 3.42)                 | —                    |
| Model 2                          | 1.0                                                                     | 1.53 (1.05 to 2.21) | 2.25 (1.11 to 4.59) | 4.07 (1.19 to 13.92) | .026                                  | 1.71 (1.07 to 2.73)                 | —                    |

Model 1 adjusted for age, sex, race/ethnicity, and total energy intake. Model 2 adjusted for age, gender, race/ethnicity, weight status (normal, overweight, and obese except for the weight-stratified analyses where we include BMI as a continuous variable), physical activity, table-salt use, and estimated usual intakes of potassium. Physical activity was consistently measured among children  $\geq 12$  y of age in NHANES 2003–2006, but the questions was modified in NHANES 2007–2008, we adjusted for the modified questions to calculate the physical activity categories across the surveys.

<sup>a</sup> *P* value for trend across percentiles of estimated usual intake of sodium based on Satterthwaite adjusted *F* test; all tests two-tailed.

<sup>b</sup> ORs are for per 1000 mg/d of estimated usual intake of sodium.

**SUPPLEMENTAL TABLE 6** Adjusted Associations Between Each 1000 mg/d Increase in Sodium Intake and SDS of BP Among US Children and Adolescents With 3 Blood Pressure Measurements, Based on 2 Models, Overall and by Weight Status, NHANES 2003–2008

| Characteristics  | Number of Participants | SDS of SBP                                     |                | SDS of DBP                                     |                |
|------------------|------------------------|------------------------------------------------|----------------|------------------------------------------------|----------------|
|                  |                        | $\beta$ -Coefficient (95% CI)<br>per 1000 mg/d | <i>P</i> Value | $\beta$ -Coefficient (95% CI)<br>per 1000 mg/d | <i>P</i> Value |
| All              | 4832                   |                                                |                |                                                |                |
| Model 1          |                        | 0.115 (−0.007 to 0.237)                        | .063           | −0.085 (−0.213 to 0.042)                       | .185           |
| Model 2          |                        | 0.093 (−0.028 to 0.215)                        | .129           | −0.080 (−0.209 to 0.049)                       | .218           |
| Weight status    |                        |                                                |                |                                                |                |
| Normal weight    | 2858                   |                                                |                |                                                |                |
| Model 1          |                        | 0.010 (−0.124 to 0.145)                        | .876           | −0.167 (−0.325 to −0.008)                      | .040           |
| Model 2          |                        | −0.014 (−0.152 to 0.125)                       | .844           | −0.166 (−0.322 to −0.011)                      | .037           |
| Overweight/obese | 1974                   |                                                |                |                                                |                |
| Model 1          |                        | 0.263 (0.082 to 0.444)                         | .005           | 0.066 (−0.173 to 0.305)                        | .583           |
| Model 2          |                        | 0.196 (0.027 to 0.366)                         | .024           | 0.056 (−0.180 to 0.292)                        | .635           |

Model 1 adjusted for age, gender, race/ethnicity, and total energy intake. Model 2 adjusted for age, gender, race/ethnicity, weight status (normal, overweight, and obese except for the weight-stratified analyses for which we included BMI as a continuous variable), table-salt use, and estimated usual intakes of potassium. *P* values for usual intake of sodium by BMI interactions were 0.653 and 0.669 for SBP and DBP, respectively, based on Satterthwaite adjusted *F* test; all tests are 2-tailed.

**SUPPLEMENTAL TABLE 7** Adjusted ORs for PHB and HBP Among US Children and Adolescents With 3 BP Measurements, by Quartile of Usual Daily Sodium Intake, NHANES, 2003–2008

| Characteristics                     | Midvalue of Quartiles of Estimated Usual Intake of Sodium in Population |                     |                     |                      | <i>P</i> Value for Trend <sup>a</sup> | Total/OR per 1000 mg/d <sup>b</sup> | RERI (95% CI)           |
|-------------------------------------|-------------------------------------------------------------------------|---------------------|---------------------|----------------------|---------------------------------------|-------------------------------------|-------------------------|
|                                     | Q1                                                                      | Q2                  | Q3                  | Q4                   |                                       |                                     |                         |
| Total ( <i>n</i> = 4832)            |                                                                         |                     |                     |                      |                                       |                                     |                         |
| Usual intakes (range: 1334–8177)    | 2569                                                                    | 3073                | 3517                | 4303                 |                                       |                                     |                         |
| Model 1                             | 1.0                                                                     | 1.29 (0.98 to 1.70) | 1.63 (0.96 to 2.75) | 2.31 (0.94 to 5.67)  | .068                                  | 1.44 (0.97 to 2.14)                 | 0.244 (−0.127 to 1.015) |
| Model 2                             | 1.0                                                                     | 1.28 (0.98 to 1.67) | 1.60 (0.96 to 2.66) | 2.23 (0.93 to 5.36)  | .073                                  | 1.42 (0.97 to 2.09)                 | 0.242 (−0.129 to 1.036) |
| Weight status                       |                                                                         |                     |                     |                      |                                       |                                     |                         |
| Normal weight ( <i>n</i> = 2858)    |                                                                         |                     |                     |                      |                                       |                                     |                         |
| Usual intakes (range: 1354–8177)    | 2623                                                                    | 3120                | 3541                | 4420                 |                                       |                                     |                         |
| Model 1                             | 1.0                                                                     | 1.05 (0.80 to 1.37) | 1.10 (0.65 to 1.83) | 1.17 (0.48 to 2.83)  | .722                                  | 1.07 (0.73 to 1.58)                 | —                       |
| Model 2                             | 1.0                                                                     | 1.00 (0.76 to 1.31) | 0.99 (0.59 to 1.68) | 0.99 (0.40 to 2.44)  | .980                                  | 1.00 (0.67 to 1.48)                 | —                       |
| Overweight/obese ( <i>n</i> = 1974) |                                                                         |                     |                     |                      |                                       |                                     |                         |
| Usual intakes (range: 1334–6862)    | 2428                                                                    | 2955                | 3464                | 4115                 |                                       |                                     |                         |
| Model 1                             | 1.0                                                                     | 1.67 (1.13 to 2.48) | 2.65 (1.25 to 5.59) | 5.31 (1.47 to 19.17) | .012                                  | 2.08 (1.18 to 3.65)                 | —                       |
| Model 2                             | 1.0                                                                     | 1.50 (1.05 to 2.14) | 2.15 (1.09 to 4.25) | 3.72 (1.16 to 11.95) | .028                                  | 1.78 (1.07 to 2.97)                 | —                       |
